# Supplementary material for: A taxonomic reassessment of Piramys auffenbergi , a neglected turtle from the late Miocene of Piram Island, Gujarat, India
Source: PeerJ journal article supplement (doi:10.7717/peerj.5938), 2018-11-15
Supplement: supplementary-file_S2.pdf [file supplementary-file_S2.pdf]

1 Supplementary File S2 for

2

3

4 A taxonomic reassessment of *Piramys auffenbergi*, a neglected turtle  
5 from the late Miocene of Piram Island, Gujarat, India

6

7 Gabriel S. Ferreira, Saswati Bandyopadhyay, Walter G. Joyce

8 correspondece to: Walter G. Joyce, walter.joyce@unifr.ch, walter.g.joyce@gmail.com

9

10

11

12

13

14 **This PDF file includes additional information of the phylogenetic analyses**

15 1. List of changes to Ferreira et al. (2018)'s matrix

16 2. Strict consensus tree with node numbers

17 3. Bootstrap, Jackknife & Bremer support information

18 4. List of common synapomorphies for Stereogenyina

19

20

21 **1. Changes to Ferreira et al. (2018)'s matrix**

22 *Char. 5: PF, preorbital skull broad*

23 Scoring: *Lemurchelys diasphax* – 1 > 0

24 *Stereogenys cromeri* – 1 > 0

25 *Shweboemys pilgrimi* – 1 > 0

26 *Brontochelys gaffneyi* – 1 > 0

27

28 *Char. 9: FR, interorbital groove*

29 Scoring: *Mogharemys blackenhorni* – 0 > ?

30 *Brontochelys gaffneyi* – 0 > ?

31

32 *Char. 12: FR, prefrontal/frontal*

33 Scoring: *Bairdemys sanchezi* – 1 > 0

34

35 *Char. 14: Anteroventral emargination*

36 Scoring: *Cordichelys antiqua* – 1 > 0

37

38 *Char. 15: QJ, quadratojugal*

39 Scoring: *Stereogenys cromeri* – ? > 1

40

41 *Char. 19: PA, dorsal portion in relation to adductor fossa*

42 Scoring: *Stereogenys cromeri* – 0 > ?

43

44 *Char. 23: PA, PA-JU contact*

45 Scoring: *Shweboemys pilgrimi* – 0 > ?

46

47 *Char. 25: PA, parietal contacts pterygoid at base of processus trochlearis pterygoidei*

48 Scoring: *Mogharemys blackenhorni* – 0 > 1

49 *Brontochelys gaffneyi* – 0 > 1

50 *Lemurchelys diasphax* – 0 > 1

51 *Stereogenys cromeri* – 0 > 1

- 52 *Cordichelys antiqua* – 0 > 1
- 53 *Latentemys plowdeni* – 0 > 1
- 54 *Bairdemys thalassica* – 0 > 1
- 55 *Bairdemys sanchezi* – 0 > 1
- 56 *Bairdemys hartsteini* – 0 > ?
- 57 *Bairdemys venezuelensis* – 0 > ?
- 58 *Shweboemys pilgrimi* – 0 > ?
- 59
- 60 *Char. 26: PA, PA-PT contact in septum orbitotemporale*
- 61 Scoring: *Caninemys tridentata* – 2 > 0
- 62
- 63 *Char. 27: PA, interparietal scale*
- 64 Scoring: *Bairdemys sanchezi* – 1 > ?
- 65
- 66 *Char. 29: PA, interparietal scale meeting medially*
- 67 Scoring: *Bairdemys winklerae* – 1 > ?
- 68
- 69 *Char. 41: PM, pinched snout*
- 70 Scoring: *Cordichelys antiqua* – 0 > 1
- 71 *Bairdemys hartsteini* – 0 > 1
- 72
- 73 *Char. 43: PM, protrudes cranially in lateral view beyond apertura narium interna dorsal ridge*
- 74 Statement: this character refers to the premaxilla protruding beyond the dorsal ridge (in lateral
- 75 view) of the apertura narium externa, not interna as originally stated.
- 76 Scoring: *Shweboemys pilgrimi* – ? > 1
- 77
- 78 *Char. 57: MX, triturating surface shape*
- 79 Scoring: *Brontochelys gaffneyi* – 1 > 2
- 80 *Shweboemys pilgrimi* – 1 > 2
- 81 *Stereogenys cromeri* – 1 > 2
- 82 *Cordichelys antiqua* – 1 > 2

- 83 *Latentemys plowdeni* – 1 > 2  
84 *Bairdemys venezuelensis* – 1 > 2  
85 *Bairdemys hartsteini* – 1 > 2  
86 *Bairdemys sanchezi* – 1 > 2  
87 *Bairdemys winklerae* – 1 > 2

88  
89 *Char. 114: EX-QU contact*

- 90 Scoring: *Cordichelys antiqua* – 1 > 0  
91 *Latentemys plowdeni* – 1 > 0  
92 *Bairdemys thalassica* – 1 > 0  
93 *Bairdemys venezuelensis* – 1 > 0  
94 *Bairdemys hartsteini* – 1 > 0  
95 *Bairdemys sanchezi* – 1 > 0  
96 *Bairdemys winklerae* – 1 > 0

97  
98 **New character:** 246. *PM, median notch in upper jaw:* 0, notch absent, mx and pm ventral ridge  
99 runs anteroventrally, forming an anterior hook (*Peltocephalus dumerilianus*); 1, notch absent or  
100 very shallow, mx and pm ventral ridge runs anteriorly to the midline (*Euraxemys essweini*); 2,  
101 notch present, mx and pm ventral ridge runs anterodorsally to the midline (*Podocnemis unifilis*)  
102

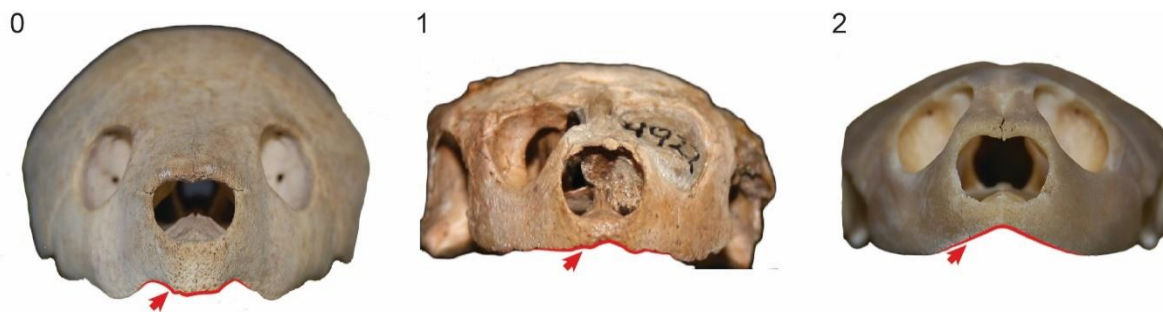

103  
104  
105

106 **2. Strict consensus tree with node numbers**

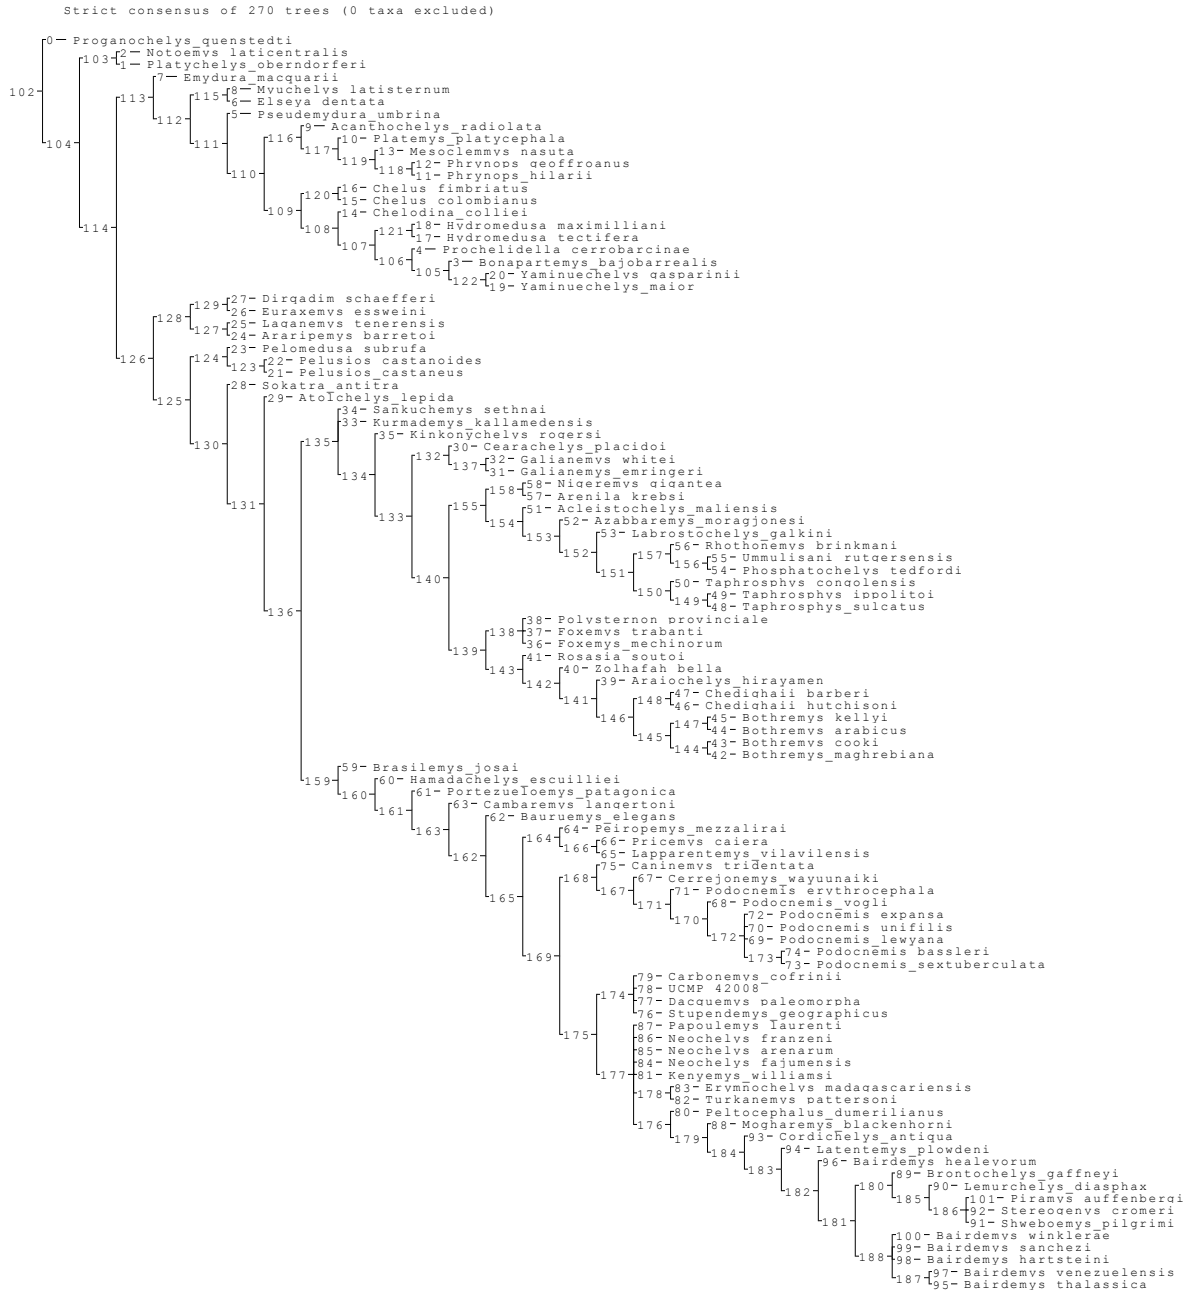

107  
108 **Figure S2-1. Strict consensus tree from 270 most parsimonious trees with 1134 steps**

109

110 **3. Bootstrap, Jackknife & Bremer support information**

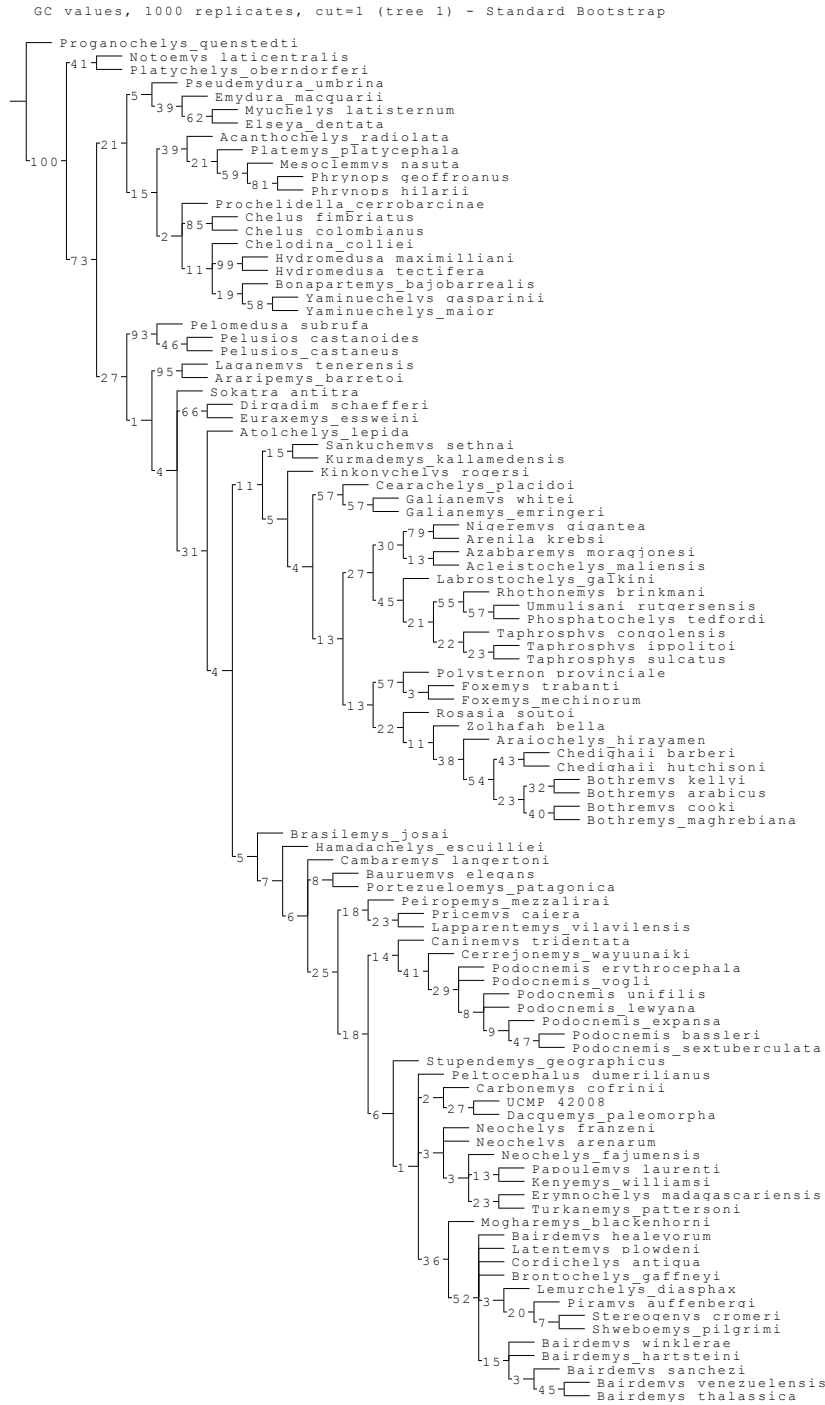

Taxonomic reassessment of *Piramus auffenbergi*: Supplementary File S2

Group freqs., 1000 replicates, cut=50 (tree 0) - Standard Bootstrap

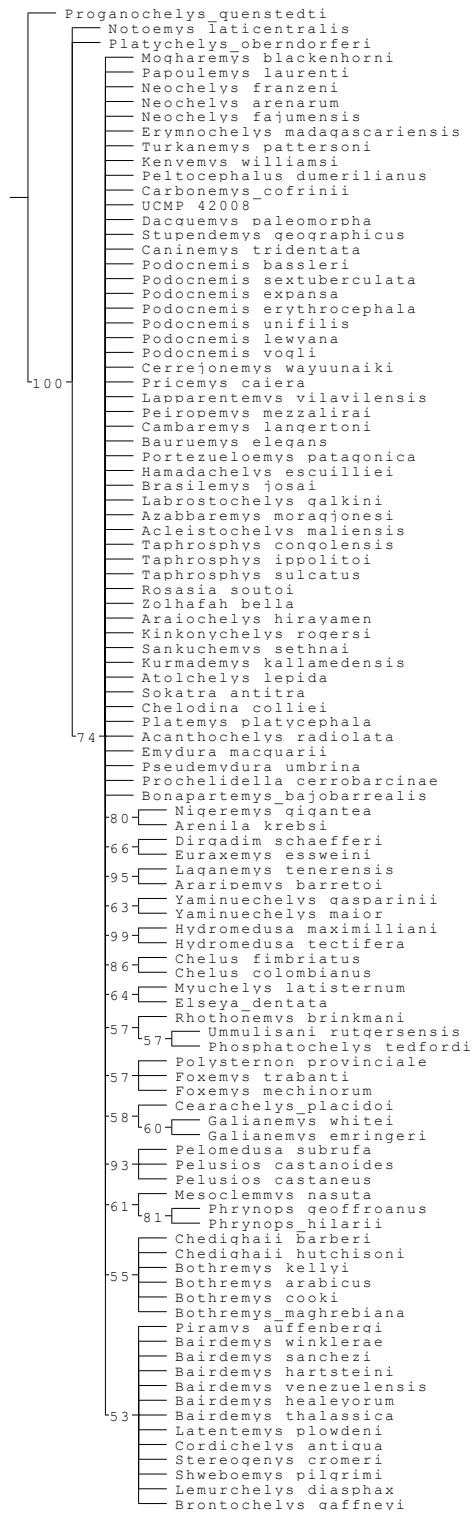

114

115 **Figure S2-3.** Group frequencies Bootstrap values of 1000 replicates (cut = 50)

116

Taxonomic reassessment of *Piramus auffenbergi*: Supplementary File S2

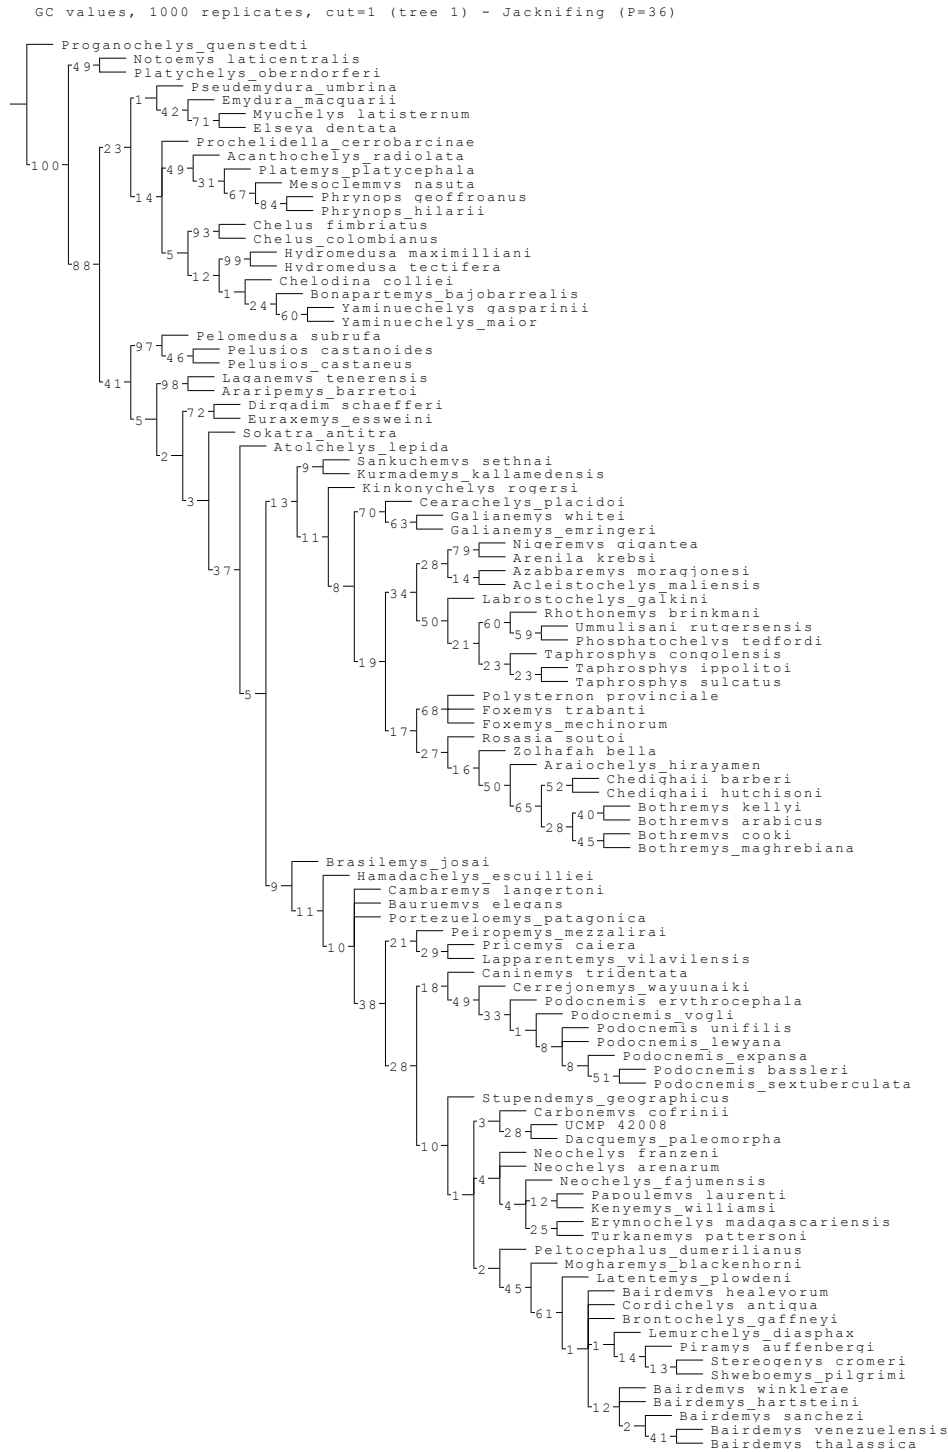



Taxonomic reassessment of *Piramus auffenbergi*: Supplementary File S2

Group freqs., 1000 replicates, cut=50 (tree 0) - Jackknifing (P=36)

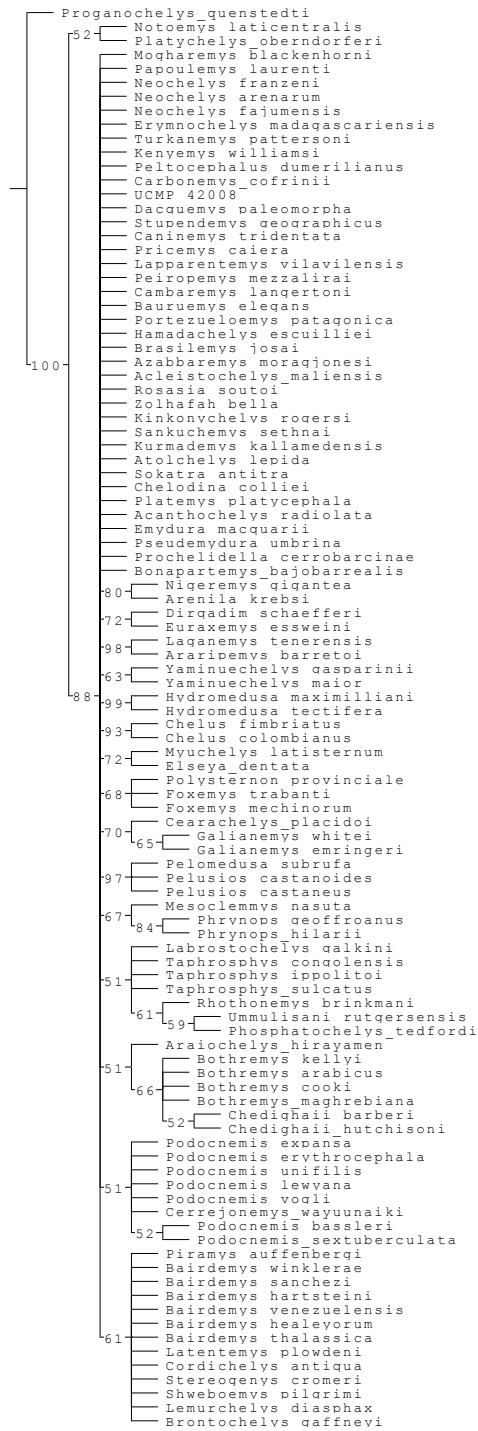

120

121 **Figure S2-5.** Group frequencies Jackknife values for 1000 replicates (cut = 50)

122

Taxonomic reassessment of *Pirameys auffenbergi*: Supplementary File S2

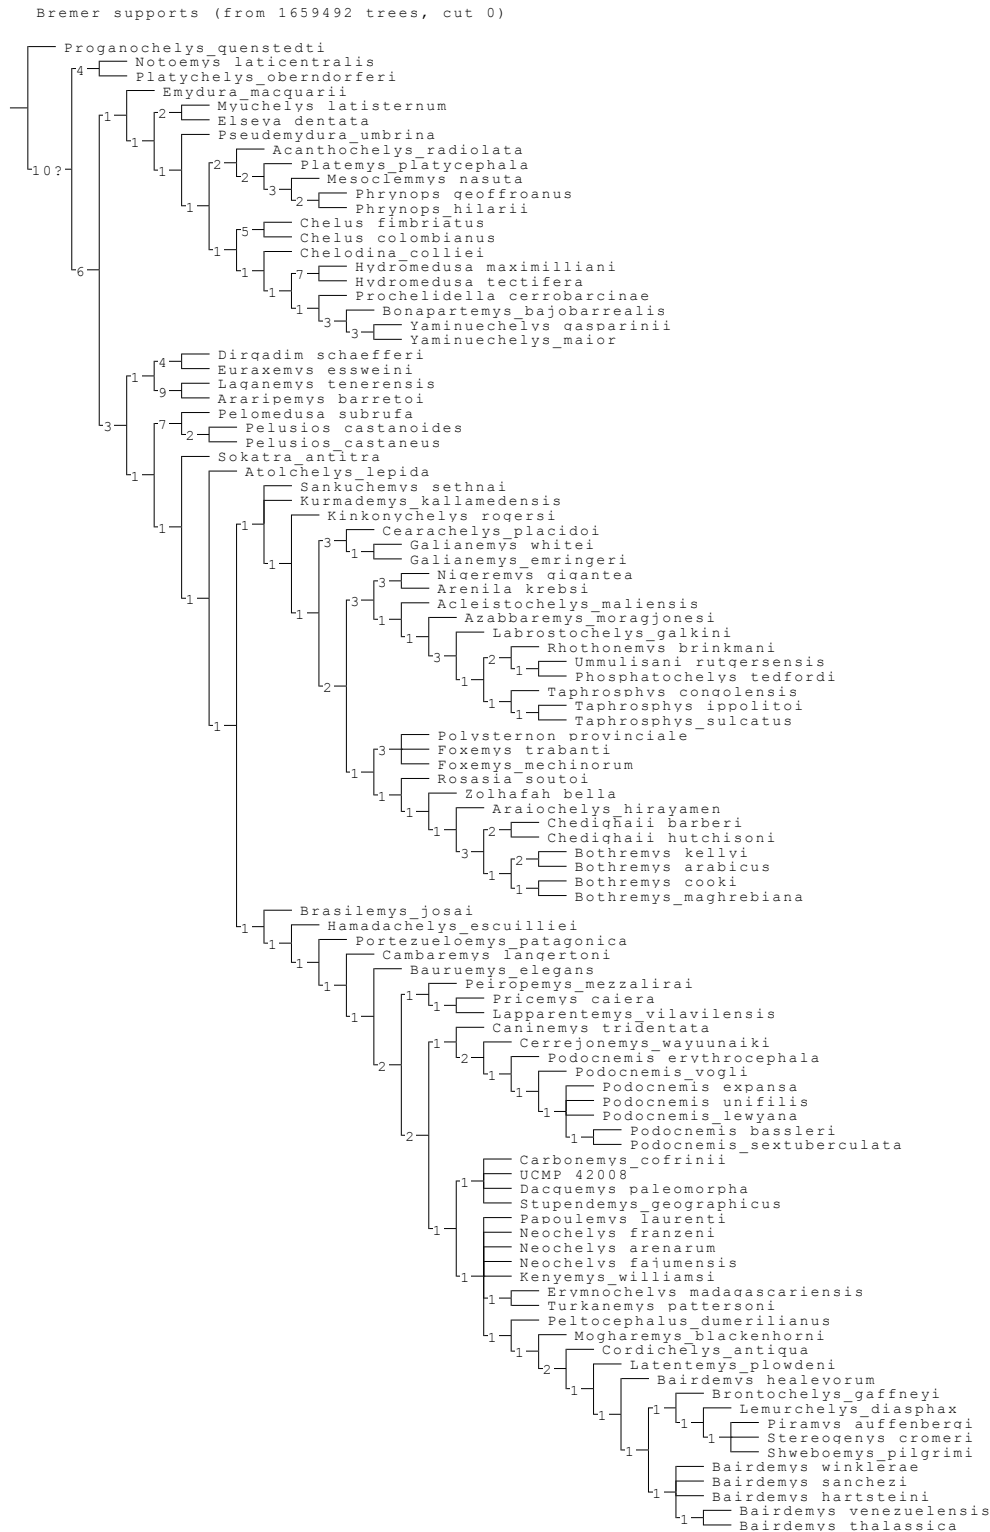

123  
 124 **Figure S2-6.** Bremer support values using TBR from existing trees retaining suboptimal trees by  
 125 10 steps  
 126

127 **4. List of common synapomorphies for Stereogenyina**

|     |                                  |     |                                  |
|-----|----------------------------------|-----|----------------------------------|
| 128 | <i>Mogharemys blackenhorni</i> : | 159 | Char. 182: 1 --> 2               |
| 129 | All trees:                       | 160 | Char. 192: 1 --> 0               |
| 130 | Char. 53: 0 --> 1                | 161 | Char. 205: 0 --> 1               |
| 131 | Char. 113: 0 --> 1               | 162 | Some trees:                      |
| 132 | Char. 117: 1 --> 0               | 163 | Char. 233: 1 --> 0               |
| 133 |                                  | 164 |                                  |
| 134 | <i>Brontochelys gaffneyi</i> :   | 165 | <i>Latentemys plowdeni</i> :     |
| 135 | All trees:                       | 166 | All trees:                       |
| 136 | No autapomorphies:               | 167 | Char. 40: 1 --> 0                |
| 137 |                                  | 168 | Char. 245: 1 --> 2               |
| 138 | <i>Lemurchelys diasphax</i> :    | 169 |                                  |
| 139 | All trees:                       | 170 | <i>Bairdemys thalassica</i> :    |
| 140 | Char. 110: 1 --> 0               | 171 | All trees:                       |
| 141 |                                  | 172 | Char. 102: 0 --> 1               |
| 142 | <i>Shweboemys pilgrimi</i> :     | 173 |                                  |
| 143 | All trees:                       | 174 | <i>Bairdemys healeyorum</i> :    |
| 144 | No autapomorphies:               | 175 | All trees:                       |
| 145 |                                  | 176 | Char. 180: 0 --> 1               |
| 146 | <i>Stereogenys cromeri</i> :     | 177 | Char. 241: 1 --> 0               |
| 147 | All trees:                       | 178 |                                  |
| 148 | Char. 129: 1 --> 2               | 179 | <i>Bairdemys venezuelensis</i> : |
| 149 | Some trees:                      | 180 | All trees:                       |
| 150 | Char. 42: 1 --> 0                | 181 | No autapomorphies:               |
| 151 |                                  | 182 |                                  |
| 152 | <i>Cordichelys antiqua</i> :     | 183 | <i>Bairdemys hartsteini</i> :    |
| 153 | All trees:                       | 184 | Some trees:                      |
| 154 | Char. 8: 0 --> 1                 | 185 | Char. 124: 1 --> 0               |
| 155 | Char. 32: 1 --> 0                | 186 |                                  |
| 156 | Char. 76: 0 --> 1                | 187 | <i>Bairdemys sanchezi</i> :      |
| 157 | Char. 169: 0 --> 1               | 188 | All trees:                       |
| 158 | Char. 181: 2 --> 1               | 189 | Char. 17: 1 --> 2                |

Taxonomic reassessment of *Piramus auffenbergi*: Supplementary File S2

|     |                              |     |                    |
|-----|------------------------------|-----|--------------------|
| 190 | Char. 110: 1 --> 0           | 223 | All trees:         |
| 191 | Some trees:                  | 224 | Char. 88: 0 --> 1  |
| 192 | Char. 11: 1 --> 0            | 225 |                    |
| 193 | Char. 18: 0 --> 1            | 226 | <b>Node 183:</b>   |
| 194 | Char. 40: 1 --> 0            | 227 | All trees:         |
| 195 | Char. 58: 1 --> 0            | 228 | Char. 90: 0 --> 1  |
| 196 | Char. 129: 1 --> 2           | 229 |                    |
| 197 |                              | 230 | <b>Node 184:</b>   |
| 198 | <i>Bairdemys winklerae</i> : | 231 | All trees:         |
| 199 | Some trees:                  | 232 | Char. 54: 1 --> 0  |
| 200 | Char. 18: 0 --> 1            | 233 | Char. 55: 1 --> 2  |
| 201 |                              | 234 | Char. 69: 0 --> 1  |
| 202 | <i>Piramus auffenbergi</i> : | 235 | Char. 74: 1 --> 2  |
| 203 | All trees:                   | 236 | Char. 75: 0 --> 1  |
| 204 | Char. 8: 0 --> 1             | 237 | Char. 89: 0 --> 1  |
| 205 | Some trees:                  | 238 | Char. 127: 0 --> 1 |
| 206 | Char. 119: 0 --> 1           | 239 |                    |
| 207 |                              | 240 | <b>Node 185:</b>   |
| 208 | <b>Node 179:</b>             | 241 | All trees:         |
| 209 | All trees:                   | 242 | Char. 76: 0 --> 1  |
| 210 | Char. 73: 0 --> 1            | 243 |                    |
| 211 | Char. 78: 0 --> 1            | 244 | <b>Node 186:</b>   |
| 212 | Char. 110: 0 --> 1           | 245 | Some trees:        |
| 213 |                              | 246 | Char. 32: 1 --> 0  |
| 214 | <b>Node 180:</b>             | 247 | Char. 77: 0 --> 2  |
| 215 | All trees:                   | 248 | Char. 79: 0 --> 1  |
| 216 | Char. 53: 0 --> 1            | 249 | Char. 114: 1 --> 2 |
| 217 |                              | 250 | Char. 245: 1 --> 2 |
| 218 | <b>Node 181:</b>             | 251 |                    |
| 219 | All trees:                   | 252 | <b>Node 187:</b>   |
| 220 | Char. 140: 1 --> 0           | 253 | All trees:         |
| 221 |                              | 254 | Char. 77: 0 --> 1  |
| 222 | <b>Node 182:</b>             | 255 | Char. 87: 1 --> 0  |

Taxonomic reassessment of *Piramus auffenbergi*: Supplementary File S2

256 Some trees:

257 Char. 129: 1 --> 2

258

259 **Node 188:**

260 All trees:

261 Char. 34: 0 --> 1

262 Char. 35: 0 --> 1

263 Some trees:

264 Char. 11: 0 --> 1

265 Char. 58: 0 --> 1

266 Char. 70: 12 --> 0

267 Char. 124: 0 --> 1
